# Supplementary material for: UDP-glucose dehydrogenase modulates proteoglycan synthesis in articular chondrocytes: its possible involvement and regulation in osteoarthritis
Source: Springer Nature journal article supplement (doi:10.1186/s13075-014-0484-2), 2014-12-02
Supplement: MOESM1 [file 9783396]

Additional file 1

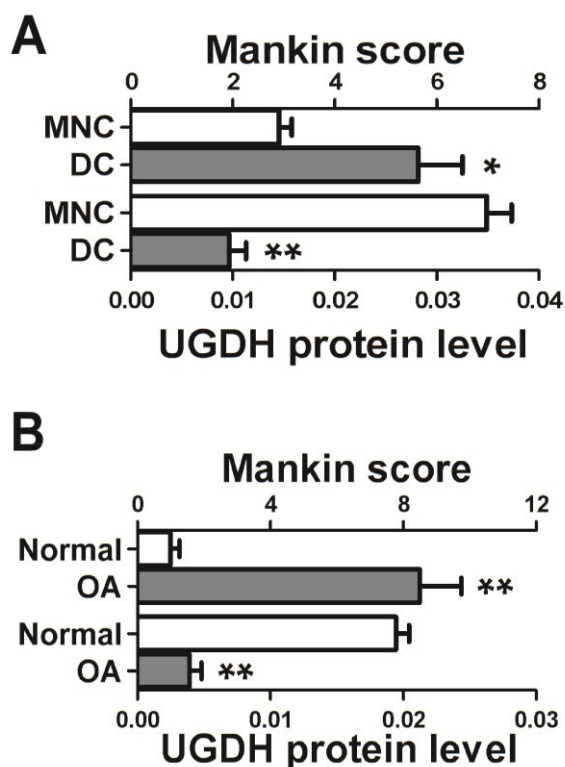

**Additional figure 1** UDP-glucose dehydrogenase (UGDH) protein expression and Mankin score of osteoarthritis cartilage. A, UGDH protein level of human cartilage was detected using immunohistochemical (IHC) assay and presented as mean optical density of each chondrocyte using NIS-Elements software (Nikon, Tokyo, Japan). Modified Mankin score system was applied to grade the OA degrees. B, UGDH protein level and Mankin score of rat cartilage were also obtained. Values were presented as Mean  $\pm$  S.E.M. \*  $P<0.05$  and \*  $P<0.01$  versus control.
