# Supplementary material for: UDP-glucose dehydrogenase modulates proteoglycan synthesis in articular chondrocytes: its possible involvement and regulation in osteoarthritis
Source: Springer Nature journal article supplement (doi:10.1186/s13075-014-0484-2), 2014-12-02
Supplement: MOESM2 [file 9783396]

Additional file 2

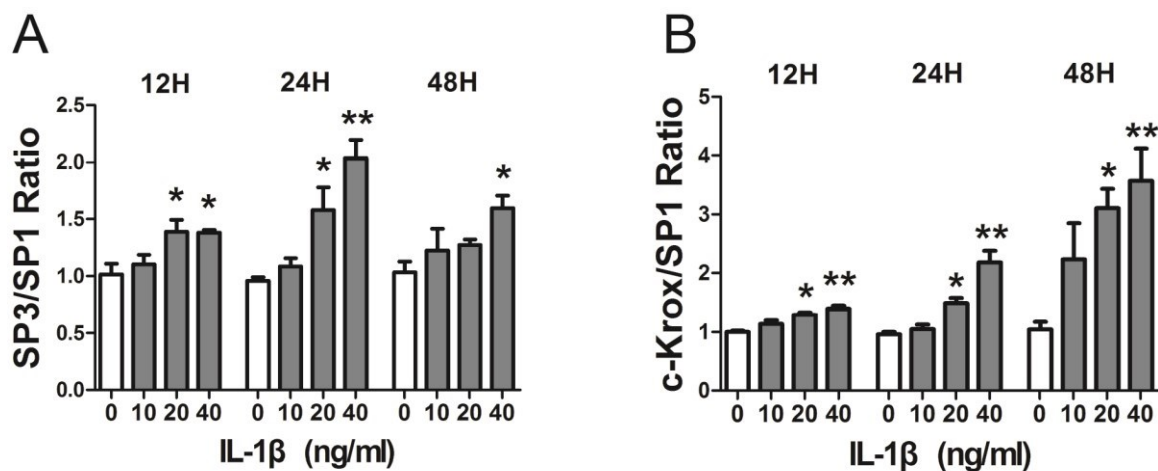

**Additional figure 2** Interleukin 1 beta (IL-1 $\beta$ ) modulated the ratio of the gene expression of the trans-regulators. Relative mRNA levels of specificity protein 1 (*Sp1*), *Sp3* and Krueppel-related zinc finger protein c-Krox (*c-Krox*) were detected using real time quantitative PCR assay. A, The ratio of Sp3/Sp1 was obtained from the relative mRNA level of *Sp1* and *Sp3*. B, c-Krox/Sp1 ratio was obtained as well. Values were presented as Mean  $\pm$  S.E.M. from at least three independent experiments. \*  $P < 0.05$  and \*\*  $P < 0.01$  versus control.
